# Supplementary material for: Comparative Chloroplast Genomics of Dipsacales Species: Insights Into Sequence Variation, Adaptive Evolution, and Phylogenetic Relationships
Source: Front Plant Sci. 2018 May 23;9:689. doi: 10.3389/fpls.2018.00689 (PMC5974163; doi:10.3389/fpls.2018.00689)
Supplement: TABLE S6 — Maximum likelihood parameter estimates for 75 genes in Dipsacales. [file Table_6.XLSX]

## Sheet: Sheet1
Table S6 Maximum likelihood parameter estimates for 75 genes in 14 Dipsacales.
gene	model	l	np	Estimates of parameters		positively selected sites
atpA	model1	-3226.48	24	p= 0.86513 0.13487	w= 0.02425 1.00000
	model2	-3203.66	26	p= 0.85955 0.13218 0.00826	w= 0.03251 1.00000 13.96099	308 H 0.999**
	model7	-3227.56	24	p = 0.03108 q = 0.17874
	model8	-3204.14	26	p0 = 0.99125 p = 0.04494 q = 0.23198	(p1 = 0.00875) w = 13.56165	308 H 1.000** 427 K 0.992** 463 N 0.998**
atpB	model1	-2891.67	24	p= 0.90405 0.09595	w= 0.03498 1.00000
	model2	-2867.64	26	p= 0.88176 0.11605 0.00219	w= 0.03123 1.00000 44.75304
	model7	-2891.91	24	p = 0.03203 q = 0.20834
	model8	-2867.84	26	p0 = 0.99779 p = 0.03536 q = 0.20954	(p1 = 0.00221) w = 44.41777	378 G 0.994**
atpE	model1	-766.028	24	p= 0.81483 0.18517	w= 0.01437 1.00000
	model2	-765.736	26	p= 0.91344 0.00000 0.08656	w= 0.06624 1.00000 1.80909
	model7	-766.039	24	p = 0.01057 q = 0.03650
	model8	-765.74	26	p0 = 0.91347 p = 7.09264 q = 99.00000	(p1 = 0.08653) w = 1.80785
atpF	model1	-1167.94	24	p= 0.72809 0.27191	w= 0.07843 1.00000
	model2	-1167.76	26	p= 0.90325 0.00000 0.09675	w= 0.17765 1.00000 1.92271
	model7	-1168.01	24	p = 0.10009 q = 0.19995
	model8	-1167.77	26	p0 = 0.90415 p = 21.60276 q = 99.00000	(p1 = 0.09585) w = 1.92736
atpH	model1	-435.657	24	p= 0.99999 0.00001	w= 0.03017 1.00000
	model2	-411.202	26	p= 0.98778 0.00000 0.01222	w= 0.07121 1.00000 96.03990
	model7	-435.666	24	p = 3.13322 q = 99.00000
	model8	-411.206	26	p0 = 0.98778 p = 7.63361 q = 99.00000	(p1 = 0.01222) w = 95.81521
atpI	model1	-1333.43	24	p= 0.93048 0.06952	w= 0.00758 1.00000
	model2	-1306.19	26	p= 0.99189 0.00000 0.00811	w= 0.07216 1.00000 45.57761	101 L 0.999**
	model7	-1334.03	24	p = 0.00500 q = 0.03872
	model8	-1306.2	26	p0 = 0.99189 p = 7.75416 q = 99.00000	(p1 = 0.00811) w = 45.58547	101 L 1.000**
ccsA	model1	-2277.73	24	p= 0.74600 0.25400	w= 0.04478 1.00000
	model2	-2275.93	26	p= 0.82091 0.12922 0.04986	w= 0.09259 1.00000 2.64417
	model7	-2278.02	24	p = 0.01513 q = 0.03028
	model8	-2275.87	26	p0 = 0.93785 p = 0.32095 q = 1.34262 (p1 = 0.06215)	w = 2.53012
cemA	model1	-1486.22	24	p= 0.73545 0.26455	w= 0.15000 1.00000
	model2	-1463.63	26	p= 0.50773 0.48791 0.00436	w= 0.05960 1.00000 50.86046
	model7	-1486.39	24	p = 0.26259 q = 0.42996
	model8	-1463.65	26	p0 = 0.99564 p = 0.02516 q = 0.02172 (p1 = 0.00436)	w = 51.04199
clpP	model1	-1224.14	24	p= 0.38269 0.61731	w= 0.29307 1.00000
	model2	-1213.91	26	p= 0.18925 0.69074 0.12002	w= 0.37779 1.00000 5.56910	4 I 0.994** 9 W 0.998**
	model7	-1225.26	24	p = 0.71712 q = 0.21687
	model8	-1213.89	26	p0 = 0.87707 p = 1.02523 q = 0.18541 (p1 = 0.12293)	w = 5.44223	4 I 0.995** 9 W 0.998**
infA	model1	-594.843	24	p= 0.82993 0.17007	w= 0.18975 1.00000
	model2	-590.051	26	p= 0.96867 0.00000 0.03133	w= 0.30978 1.00000 6.74721	6 S 0.996**
	model7	-595.881	24	p = 0.39299 q = 0.63793
	model8	-590.06	26	p0 = 0.96892 p = 44.73952 q = 99.00000 (p1 = 0.03108)	w = 6.78042	6 S 0.998**
matK	model1	-3815.32	24	p= 0.65762 0.34238	w= 0.09852 1.00000
	model2	-3808.04	26	p= 0.63729 0.36056 0.00215	w= 0.09563 1.00000 17.90099
	model7	-3815.5	24	p = 0.15953 q = 0.23162
	model8	-3807.9	26	p0 = 0.99784 p = 0.18623 q = 0.26469 (p1 = 0.00216)	w = 17.56547	81 A 0.994**
ndhA	model1	-2166.92	24	p= 0.81036 0.18964	w= 0.02311 1.00000
	model2	-2166.41	26	p= 0.82261 0.17467 0.00271	w= 0.03281 1.00000 11.81050
	model7	-2166.92	24	p = 0.03687 q = 0.14007
	model8	-2166.31	26	p0 = 0.99703 p = 0.06707 q = 0.27457 (p1 = 0.00297)	w = 11.57158
ndhB	model1	-2023.02	24	p= 0.99999 0.00001	w= 0.10923 1.00000
	model2	-2023.02	26	p= 1.00000 0.00000 0.00000	w= 0.10924 1.00000 1.00000
	model7	-2023.03	24	p = 12.18205 q = 99.00000
	model8	-2023.03	26	p0 = 0.99999 p = 12.18066 q = 99.00000 (p1 = 0.00001)	w = 1.00000
ndhC	model1	-740.074	24	p= 0.91371 0.08629	w= 0.01040 1.00000
	model2	-726.308	26	p= 0.86450 0.12701 0.00849	w= 0.00000 1.00000 23.39403
	model7	-740.098	24	p = 0.02570 q = 0.25291
	model8	-726.443	26	p0 = 0.99146 p = 0.00688 q = 0.04318 (p1 = 0.00854)	w = 22.61291
ndhD	model1	-3208.1	24	p= 0.89918 0.10082	w= 0.07646 1.00000
	model2	-3208.1	26	p= 0.89918 0.03853 0.06229	w= 0.07646 1.00000 1.00000
	model7	-3208.12	24	p = 0.18922 q = 0.93338
	model8	-3208.1	26	p0 = 0.90396 p = 1.94159 q = 21.69929 (p1 = 0.09604)	w = 1.00000
ndhE	model1	-628.134	24	p= 0.99999 0.00001	w= 0.03702 1.00000
	model2	-617.142	26	p= 0.99016 0.00000 0.00984	w= 0.05460 1.00000 19.44436
	model7	-628.176	24	p = 3.88019 q = 99.00000
	model8	-617.171	26	p0 = 0.99016 p = 5.79749 q = 99.00000 (p1 = 0.00984)	w = 19.46742
ndhG	model1	-1098.55	24	p= 0.86196 0.13804	w= 0.05740 1.00000
	model2	-1080.4	26	p= 0.75894 0.23513 0.00594	w= 0.03189 1.00000 34.07939
	model7	-1098.77	24	p = 0.08570 q = 0.35945
	model8	-1080.47	26	p0 = 0.99406 p = 0.03297 q = 0.09352 (p1 = 0.00594)	w = 34.19604
ndhI	model1	-1055.8	24	p= 0.86157 0.13843	w= 0.03832 1.00000
	model2	-1053.65	26	p= 0.89092 0.09527 0.01380	w= 0.06156 1.00000 7.85791
	model7	-1056.07	24	p = 0.05738 q = 0.27313
	model8	-1053.57	26	p0 = 0.98509 p = 0.16869 q = 0.98210 (p1 = 0.01491)	w = 7.65524
ndhJ	model1	-949.476	24	p= 0.99999 0.00001	w= 0.09839 1.00000
	model2	-930.925	26	p= 0.99369 0.00000 0.00631	w= 0.15739 1.00000 35.02202
	model7	-949.501	24	p = 10.89882 q = 99.00000
	model8	-930.937	26	p0 = 0.99369 p = 18.59348 q = 99.00000 (p1 = 0.00631)	w = 35.05532
ndhK	model1	-1285.56	24	p= 0.90480 0.09520	w= 0.05546 1.00000
	model2	-1285.16	26	p= 0.97410 0.00000 0.02590	w= 0.09242 1.00000 2.61001
	model7	-1285.77	24	p = 0.07701 q = 0.43460
	model8	-1285.17	26	p0 = 0.97420 p = 10.17123 q = 99.00000 (p1 = 0.02580)	w = 2.60789
petA	model1	-1863.81	24	p= 0.93389 0.06611	w= 0.09430 1.00000
	model2	-1839.73	26	p= 0.89769 0.09913 0.00317	w= 0.10542 1.00000 50.18804
	model7	-1863.74	24	p = 0.32110 q = 1.76062
	model8	-1839.66	26	p0 = 0.99682 p = 0.29080 q = 1.20782 (p1 = 0.00318)	w = 49.95958
petB	model1	-926.491	24	p= 0.99999 0.00001	w= 0.04030 1.00000
	model2	-926.491	26	p= 1.00000 0.00000 0.00000	w= 0.04031 1.00000 1.00000
	model7	-926.502	24	p = 4.21147 q = 99.00000
	model8	-926.502	26	p0 = 0.99999 p = 4.21095 q = 99.00000 (p1 = 0.00001)	w = 1.00000
petD	model1	-822.001	24	p= 0.94002 0.05998	w= 0.00000 1.00000
	model2	-821.989	26	p= 0.94564 0.00000 0.05436	w= 0.00000 1.00000 1.16025
	model7	-822.22	24	p = 0.01070 q = 0.18227
	model8	-821.989	26	p0 = 0.94564 p = 0.00500 q = 14.80887 (p1 = 0.05436)	w = 1.16022
petG	model1	-201.314	24	p= 0.99999 0.00001	w= 0.00000 1.00000
	model2	-173.496	26	p= 0.97364 0.00000 0.02636	w= 0.00000 1.00000 999.00000
	model7	-201.314	24	p = 0.00500 q = 99.00000
	model8	-173.496	26	p0 = 0.97364 p = 0.00500 q = 99.00000 (p1 = 0.02636)	w = 999.00000
petL	model1	-203.866	24	p= 0.99999 0.00001	w= 0.03082 1.00000
	model2	-192.56	26	p= 0.96854 0.00000 0.03146	w= 0.09655 1.00000 45.54087
	model7	-203.878	24	p = 3.22679 q = 99.00000
	model8	-192.563	26	p0 = 0.96854 p = 10.67050 q = 99.00000 (p1 = 0.03146)	w = 45.57446
petN	model1	-126.399	24	p= 0.99999 0.00001	w= 0.00000 1.00000
	model2	-126.399	26	p= 1.00000 0.00000 0.00000	w= 0.00000 1.00000 1.00000
	model7	-126.398	24	p = 0.00500 q = 99.00000
	model8	-126.398	26	p0 = 0.99999 p = 0.00500 q = 99.00000 (p1 = 0.00001)	w = 1.00000
psaA	model1	-4045.63	24	p= 0.95520 0.04480	w= 0.00000 1.00000
	model2	-4026.27	26	p= 0.95112 0.04733 0.00155	w= 0.00000 1.00000 32.14176
	model7	-4048.36	24	p = 0.01073 q = 0.19651
	model8	-4027.86	26	p0 = 0.99744 p = 0.00501 q = 0.09610 (p1 = 0.00256)	w = 24.77429	209 S 0.993**
psaB	model1	-4000.8	24	p= 0.97261 0.02739	w= 0.00844 1.00000
	model2	-3985.5	26	p= 0.96740 0.03124 0.00136	w= 0.00770 1.00000 25.03258
	model7	-4001.56	24	p = 0.01175 q = 0.24551
	model8	-4000.79	26	p0 = 0.97478 p = 0.01229 q = 0.39751 (p1 = 0.02522)	w = 1.00000
psaC	model1	-472.609	24	p= 0.99999 0.00001	w= 0.00000 1.00000
	model2	-453.706	26	p= 0.98780 0.00000 0.01220	w= 0.00000 1.00000 50.02473
	model7	-472.608	24	p = 0.00500 q = 99.00000
	model8	-453.706	26	p0 = 0.98780 p = 0.00500 q = 99.00000 (p1 = 0.01220)	w = 50.02467
psaI	model1	-203.272	24	p= 0.96126 0.03874	w= 0.00000 1.00000
	model2	-186.432	26	p= 0.94504 0.00000 0.05496	w= 0.00000 1.00000 66.88318
	model7	-203.722	24	p = 0.01087 q = 0.24044
	model8	-186.432	26	p0 = 0.94504 p = 0.00500 q = 99.00000 (p1 = 0.05496)	w = 66.88284
psaJ	model1	-282.586	24	p= 0.90521 0.09479	w= 0.00000 1.00000
	model2	-259.129	26	p= 0.95546 0.00000 0.04454	w= 0.14200 1.00000 108.64573	10 V 1.000**
	model7	-282.589	24	p = 0.00500 q = 0.04633
	model8	-259.13	26	p0 = 0.95546 p = 16.44384 q = 99.00000 (p1 = 0.04454)	w = 108.68170	10 V 1.000**
psbA	model1	-1903.67	24	p= 0.98274 0.01726	w= 0.00000 1.00000
	model2	-1884.27	26	p= 0.97767 0.01950 0.00283	w= 0.00000 1.00000 36.92616
	model7	-1904.65	24	p = 0.01135 q = 0.30558
	model8	-1885.25	26	p0 = 0.99717 p = 0.01127 q = 0.28518 (p1 = 0.00283)	w = 36.94685
	model0	-2703.43	23		omega (dN/dS) = 0.04872
psbB	model1	-2696.85	24	p= 0.96019 0.03981	w= 0.00935 1.00000
	model2	-2696.65	26	p= 0.97721 0.01732 0.00546	w= 0.01890 1.00000 2.83808
	model7	-2697.51	24	p = 0.01139 q = 0.20732
	model8	-2696.64	26	p0 = 0.99402 p = 0.03382 q = 0.76118 (p1 = 0.00598)	w = 3.05729
psbC	model1	-2617.41	24	p= 0.94925 0.05075	w= 0.00000 1.00000
	model2	-2597.64	26	p= 0.94371 0.05265 0.00364	w= 0.00000 1.00000 25.56212	277 A 0.988*
	model7	-2618.84	24	p = 0.01077 q = 0.19106
	model8	-2598.09	26	p0 = 0.99592 p = 0.01148 q = 0.21188 (p1 = 0.00408)	w = 24.35297	277 A 0.996**
psbD	model1	-1795.03	24	p= 0.99999 0.00001	w= 0.02928 1.00000
	model2	-1773.01	26	p= 0.99717 0.00000 0.00283	w= 0.03868 1.00000 47.29440
	model7	-1795.03	24	p = 3.03075 q = 99.00000
	model8	-1773.01	26	p0 = 0.99717 p = 4.02809 q = 99.00000 (p1 = 0.00283)	w = 47.30510
psbE	model1	-455.299	24	p= 0.99999 0.00001	w= 0.05765 1.00000
	model2	-424.932	26	p= 0.98809 0.00000 0.01191	w= 0.16356 1.00000 347.32783
	model7	-455.304	24	p = 6.11435 q = 99.00000
	model8	-424.933	26	p0 = 0.98808 p = 19.42028 q = 99.00000 (p1 = 0.01192)	w = 347.44885
psbF	model1	-243.575	24	p= 0.99999 0.00001	w= 0.00000 1.00000
	model2	-225.522	26	p= 0.97499 0.00000 0.02501	w= 0.00000 1.00000 86.04533
	model7	-243.575	24	p = 0.00500 q = 99.00000
	model8	-225.522	26	p0 = 0.97499 p = 0.00500 q = 99.00000 (p1 = 0.02501)	w = 86.04638
psbH	model1	-406.279	24	p= 0.93889 0.06111	w= 0.02476 1.00000
	model2	-404.458	26	p= 0.98557 0.00000 0.01443	w= 0.05182 1.00000 8.49574
	model7	-406.434	24	p = 0.01085 q = 0.07433
	model8	-404.468	26	p0 = 0.98557 p = 5.47405 q = 99.00000 (p1 = 0.01443)	w = 8.50417
psbI	model1	-167.501	24	p= 0.99999 0.00001	w= 0.00000 1.00000
	model2	-167.501	26	p= 1.00000 0.00000 0.00000	w= 0.00000 1.00000 1.00000
	model7	-167.501	24	p = 0.00500 q = 99.00000
	model8	-167.501	26	p0 = 0.99999 p = 0.00500 q = 99.00000 (p1 = 0.00001)	w = 1.00000
psbJ	model1	-253.279	24	p= 0.38817 0.61183	w= 0.00000 1.00000
	model2	-253.187	26	p= 0.44623 0.00000 0.55377	w= 0.00000 1.00000 1.31498
	model7	-253.28	24	p = 0.00752 q = 0.00500
	model8	-253.187	26	p0 = 0.44623 p = 0.00500 q = 2.08084 (p1 = 0.55377)	w = 1.31498
psbK	model1	-366.123	24	p= 0.87053 0.12947	w= 0.07378 1.00000
	model2	-339.492	26	p= 0.96733 0.00017 0.03250	w= 0.89600 1.00000 129.70771
	model7	-366.313	24	p = 0.00775 q = 0.02402
	model8	-339.492	26	p0 = 0.96750 p = 99.00000 q = 11.44564 (p1 = 0.03250)	w = 129.76955	15 S 0.996**
psbL	model1	-205.062	24	p= 0.99999 0.00001	w= 0.12221 1.00000
	model2	-205.063	26	p= 1.00000 0.00000 0.00000	w= 0.12220 1.00000 1.00000
	model7	-205.063	24	p = 13.85533 q = 99.00000
	model8	-205.063	26	p0 = 0.99999 p = 13.85458 q = 99.00000 (p1 = 0.00001)	w = 1.00000
psbM	model1	-241.718	24	p= 0.99999 0.00001	w= 0.04294 1.00000
	model2	-223.195	26	p= 0.97140 0.00000 0.02860	w= 0.10442 1.00000 78.96634
	model7	-241.73	24	p = 4.52990 q = 99.00000
	model8	-223.199	26	p0 = 0.97140 p = 11.64048 q = 99.00000 (p1 = 0.02860)	w = 79.02157
psbN	model1	-247.166	24	p= 0.99999 0.00001	w= 0.22820 1.00000
	model2	-247.166	26	p= 1.00000 0.00000 0.00000	w= 0.22821 1.00000 1.00000
	model7	-247.171	24	p = 29.42953 q = 99.00000
	model8	-247.171	26	p0 = 0.99999 p = 29.42899 q = 99.00000 (p1 = 0.00001)	w = 1.00000
psbT	model1	-170.205	24	p= 0.99999 0.00001	w= 0.00000 1.00000
	model2	-170.205	26	p= 1.00000 0.00000 0.00000	w= 0.00000 1.00000 14.37021
	model7	-170.205	24	p = 0.00500 q = 99.00000
	model8	-170.205	26	p0 = 0.99999 p = 0.00500 q = 6.24631 (p1 = 0.00001)	w = 2.48164
psbZ	model1	-292.674	24	p= 0.96091 0.03909	w= 0.00000 1.00000
	model2	-263.827	26	p= 0.96714 0.00000 0.03286	w= 0.00000 1.00000 495.20441
	model7	-292.839	24	p = 0.01164 q = 0.24485
	model8	-263.827	26	p0 = 0.96714 p = 0.00500 q = 23.93899 (p1 = 0.03286)	w = 495.20139
rbcL	model1	-2792.04	24	p= 0.91056 0.08944	w= 0.00000 1.00000
	model2	-2761.29	26	p= 0.90502 0.08197 0.01301	w= 0.00000 1.00000 13.22085	95 N 0.999** 328 S 0.998** 447 G 0.999**
	model7	-2792.17	24	p = 0.00500 q = 0.04802
	model8	-2761.57	26	p0 = 0.98738 p = 0.00500 q = 0.04979 (p1 = 0.01262)	w = 13.82890	95 N 1.000** 279 S 0.994** 309 I 0.997** 328 S 1.000** 447 G 1.000**
rpl2	model1	-1552.25	24	p= 0.58835 0.41165	w= 0.00000 1.00000
	model2	-1552.01	26	p= 0.88724 0.00000 0.11276	w= 0.21143 1.00000 2.20602
	model7	-1552.25	24	p = 0.01144 q = 0.01506
	model8	-1552.01	26	p0 = 0.88825 p = 26.79791 q = 99.00000 (p1 = 0.11175)	w = 2.21295
rpl14	model1	-781.469	24	p= 0.80262 0.19738	w= 0.00271 1.00000
	model2	-753.88	26	p= 0.72712 0.26470 0.00818	w= 0.00000 1.00000 73.14184
	model7	-781.469	24	p = 0.00723 q = 0.02487
	model8	-753.957	26	p0 = 0.99182 p = 0.00500 q = 0.01183 (p1 = 0.00818)	w = 76.42665
rpl16	model1	-677.588	24	p= 0.85370 0.14630	w= 0.00000 1.00000
	model2	-675.73	26	p= 0.96941 0.00000 0.03059	w= 0.06693 1.00000 5.71050
	model7	-677.804	24	p = 0.01383 q = 0.08848
	model8	-675.74	26	p0 = 0.96944 p = 7.17517 q = 99.00000 (p1 = 0.03056)	w = 5.71127
rpl20	model1	-965.701	24	p= 0.68578 0.31422	w= 0.25594 1.00000
	model2	-964.418	26	p= 0.93065 0.00000 0.06935	w= 0.38640 1.00000 3.29738
	model7	-966.095	24	p = 0.69642 q = 0.68038
	model8	-964.427	26	p0 = 0.93137 p = 62.83123 q = 99.00000 (p1 = 0.06863)	w = 3.31163
rpl22	model1	-1116	24	p= 0.43089 0.56911	w= 0.00000 1.00000
	model2	-1110.64	26	p= 0.40452 0.56676 0.02872	w= 0.00000 1.00000 7.89192	123 R 0.994**
	model7	-1116.11	24	p = 0.00746 q = 0.00500
	model8	-1110.67	26	p0 = 0.97158 p = 0.00744 q = 0.00500 (p1 = 0.02842)	w = 8.06247	123 R 0.998**
rpl23	model1	-614.611	24	p= 0.38334 0.61666	w= 0.00000 1.00000
	model2	-610.817	26	p= 0.31273 0.67590 0.01137	w= 0.00000 1.00000 25.78329
	model7	-614.617	24	p = 0.00761 q = 0.00504
	model8	-610.821	26	p0 = 0.98863 p = 0.01154 q = 0.00500 (p1 = 0.01137)	w = 26.22414
rpl32	model1	-470.377	24	p= 0.84821 0.15179	w= 0.03879 1.00000
	model2	-455.109	26	p= 0.68175 0.28138 0.03686	w= 0.00055 1.00000 19.97567	27 S 1.000**
	model7	-470.205	24	p = 0.09792 q = 0.48422
	model8	-455.069	26	p0 = 0.96310 p = 0.01628 q = 0.04597 (p1 = 0.03690)	w = 19.33178	27 S 1.000**
rpl33	model1	-432.025	24	p= 0.98979 0.01021	w= 0.36096 1.00000
	model2	-431.896	26	p= 0.99052 0.00000 0.00948	w= 0.34160 1.00000 6.85330
	model7	-432.027	24	p = 57.54993 q = 99.00000
	model8	-431.903	26	p0 = 0.99068 p = 51.70105 q = 99.00000 (p1 = 0.00932)	w = 6.86433
rpl36	model1	-216.534	24	p= 0.99999 0.00001	w= 0.01911 1.00000
	model2	-216.534	26	p= 1.00000 0.00000 0.00000	w= 0.01911 1.00000 30.06242
	model7	-216.536	24	p = 1.97849 q = 99.00000
	model8	-216.536	26	p0 = 0.99999 p = 1.97849 q = 99.00000 (p1 = 0.00001)	w = 59.59785
rpoB	model1	-6563.92	24	p= 0.71376 0.28624	w= 0.00000 1.00000
	model2	-6561.58	26	p= 0.76689 0.21116 0.02195	w= 0.04144 1.00000 3.39925
	model7	-6564.05	24	p = 0.00540 q = 0.01280
	model8	-6561.58	26	p0 = 0.97200 p = 0.08409 q = 0.27361 (p1 = 0.02800)	w = 3.17942
rpoC1	model1	-4221.34	24	p= 0.75099 0.24901	w= 0.02739 1.00000
	model2	-4219.84	26	p= 0.80553 0.17705 0.01742	w= 0.06794 1.00000 3.80331
	model7	-4221.58	24	p = 0.03142 q = 0.08553
	model8	-4219.75	26	p0 = 0.97410 p = 0.18750 q = 0.68017 (p1 = 0.02590)	w = 3.36938
rpoC2	model1	-8953.15	24	p= 0.74924 0.25076	w= 0.07434 1.00000
	model2	-8951.87	26	p= 0.88916 0.00000 0.11084	w= 0.14990 1.00000 1.71855
	model7	-8953.81	24	p = 0.10512 q = 0.23401
	model8	-8951.92	26	p0 = 0.90241 p = 19.23269 q = 99.00000 (p1 = 0.09759)	w = 1.85080
rps2	model1	-1459.23	24	p= 0.91701 0.08299	w= 0.14337 1.00000
	model2	-1433.53	26	p= 0.84658 0.14917 0.00425	w= 0.16788 1.00000 63.72299
	model7	-1459.57	24	p = 0.49245 q = 1.75459
	model8	-1433.71	26	p0 = 0.99574 p = 0.39920 q = 0.93782 (p1 = 0.00426)	w = 64.26611
rps3	model1	-1466.62	24	p= 0.19862 0.80138	w= 0.00000 1.00000
	model2	-1456.54	26	p= 0.49191 0.00000 0.50809	w= 0.00000 1.00000 3.92609	133 L 0.995**
	model7	-1467.66	24	p = 37.96748 q = 0.00500
	model8	-1456.54	26	p0 = 0.49191 p = 0.00500 q = 1.18168 (p1 = 0.50809)	w = 3.92610
rps4	model1	-1093.28	24	p= 0.86079 0.13921	w= 0.03782 1.00000	133 L 0.998**
	model2	-1092.44	26	p= 0.96550 0.00000 0.03450	w= 0.09920 1.00000 2.89880
	model7	-1093.46	24	p = 0.02711 q = 0.11787
	model8	-1092.45	26	p0 = 0.96567 p = 10.99380 q = 99.00000 (p1 = 0.03433)	w = 2.90326
rps7	model1	-902.782	24	p= 0.29943 0.70057	w= 0.00000 1.00000
	model2	-897.746	26	p= 0.59878 0.00000 0.40122	w= 0.00000 1.00000 4.63008
	model7	-903.753	24	p = 9.45259 q = 0.00500
	model8	-897.746	26	p0 = 0.59878 p = 0.00500 q = 2.03557 (p1 = 0.40122)	w = 4.63008	47 V 0.992**
rps8	model1	-837.215	24	p= 0.70701 0.29299	w= 0.02145 1.00000
	model2	-837.13	26	p= 0.82385 0.00000 0.17615	w= 0.08396 1.00000 1.45258
	model7	-837.222	24	p = 0.01383 q = 0.02785
	model8	-837.131	26	p0 = 0.82445 p = 9.20610 q = 99.00000 (p1 = 0.17555)	w = 1.45333
rps11	model1	-980.491	24	p= 0.78903 0.21097	w= 0.16549 1.00000
	model2	-980.387	26	p= 0.88420 0.08654 0.02925	w= 0.21920 1.00000 2.61778
	model7	-980.589	24	p = 0.40251 q = 0.77326
	model8	-980.369	26	p0 = 0.96944 p = 1.45294 q = 3.67719 (p1 = 0.03056)	w = 2.79665
rps12	model1	-589.961	24	p= 0.51150 0.48850	w= 0.00000 1.00000
	model2	-589.66	26	p= 0.75402 0.00000 0.24598	w= 0.00000 1.00000 2.48171
	model7	-589.962	24	p = 0.00505 q = 0.00525
	model8	-589.66	26	p0 = 0.75403 p = 0.00500 q = 1.39029 (p1 = 0.24597)	w = 2.48173
rps14	model1	-681.759	24	p= 0.74445 0.25555	w= 0.00000 1.00000
	model2	-655.056	26	p= 0.60871 0.36800 0.02329	w= 0.00000 1.00000 38.78384	41 S 0.999**
	model7	-681.926	24	p = 0.00500 q = 0.01171
	model8	-655.072	26	p0 = 0.97668 p = 0.00500 q = 0.00754 (p1 = 0.02332)	w = 39.79425	41 S 1.000**
rps15	model1	-771.389	24	p= 0.67698 0.32302	w= 0.06165 1.00000
	model2	-760.138	26	p= 0.59588 0.38111 0.02302	w= 0.04620 1.00000 14.60038	88 R 1.000**
	model7	-771.952	24	p = 0.07441 q = 0.12574
	model8	-760.12	26	p0 = 0.97653 p = 0.09025 q = 0.13040 (p1 = 0.02347)	w = 14.15718	88 R 1.000**
	model0	-508.522	23		omega (dN/dS) = 0.21551
rps16	model1	-503.002	24	p= 0.76466 0.23534	w= 0.00000 1.00000
	model2	-502.832	26	p= 0.78968 0.18938 0.02094	w= 0.01529 1.00000 3.80718
	model7	-503.061	24	p = 0.01218 q = 0.03997
	model8	-502.823	26	p0 = 0.97350 p = 0.04348 q = 0.18578 (p1 = 0.02650)	w = 3.55014
rps18	model1	-651.312	24	p= 0.46299 0.53701	w= 0.00000 1.00000
	model2	-650.659	26	p= 0.56104 0.00000 0.43896	w= 0.00000 1.00000 1.61700
	model7	-651.361	24	p = 0.00506 q = 0.00500
	model8	-650.659	26	p0 = 0.56104 p = 0.00500 q = 24.14602 (p1 = 0.43896)	w = 1.61699
rps19	model1	-716.079	24	p= 0.84204 0.15796	w= 0.09679 1.00000
	model2	-697.637	26	p= 0.69554 0.29370 0.01076	w= 0.08696 1.00000 31.33380
	model7	-716.585	24	p = 0.22267 q = 0.69057
	model8	-697.861	26	p0 = 0.98924 p = 0.08344 q = 0.13541 (p1 = 0.01076)	w = 32.44139
ycf1	model1	-14608.4	24	p= 0.34387 0.65613	w= 0.07441 1.00000
	model2	-14536.9	26	p= 0.25790 0.58051 0.16159	w= 0.05359 1.00000 3.82905	434 I 0.991** 435 R 0.997** 436 W 0.995** 454 G 0.998** 495 S 0.995**
	model7	-14610.3	24	p = 0.01447 q = 0.00500
	model8	-14537	26	p0 = 0.83966 p = 0.05131 q = 0.01923 (p1 = 0.16034)	w = 3.87007	313 H 0.991** 379 T 0.994** 380 R 0.994** 388 E 0.991** 430 T 0.996** 434 I 0.997** 435 R 0.999** 436 W 0.998** 449 L 0.996** 495 S 0.998** 997 S 0.993** 1033 R 0.993** 1035 D 0.992** 1037 I 0.990** 1038 M 0.993**
ycf2	model1	-12590.5	24	p= 0.51328 0.48672	w= 0.00000 1.00000
	model2	-12501.9	26	p= 0.41252 0.52504 0.06243	w= 0.00000 1.00000 9.05314	1 S 0.999** 4 H 0.997** 1047 S 0.997** 1170 S 0.998** 1172 P 0.992** 1173 K 0.997** 1179 D 0.998** 1183 T 0.998** 1185 E 0.991** 1190 V 0.992** 1194 S 0.999** 1818 L 0.998** 1819 P 0.993** 1820 K 1.000**
	model7	-12590.7	24	p = 0.00524 q = 0.00531
	model8	-12502.4	26	p0 = 0.93985 p = 0.00871 q = 0.00583 (p1 = 0.06015)	w = 9.72180	1 S 1.000** 4 H 0.999** 1047 S 0.999** 1170 S 0.999** 1172 P 0.996** 1173 K 0.998** 1179 D 0.999** 1180 D 0.999** 1183 T 0.999** 1184 S 0.990** 1185 E 0.995** 1190 V 0.996** 1192 H 0.991** 1194 S 0.999** 1194 S 0.999** 1385 L 0.993** 1818 L 0.999** 1819 P 0.997** 1820 K 1.000**
ycf3	model1	-954.015	24	p= 0.86695 0.13305	w= 0.00000 1.00000
	model2	-923.368	26	p= 0.81529 0.17879 0.00592	w= 0.00000 1.00000 130.61874
	model7	-954.367	24	p = 0.00573 q = 0.04120
	model8	-923.418	26	p0 = 0.99408 p = 0.00500 q = 0.02046 (p1 = 0.00592)	w = 134.90132
ycf4	model1	-1177.58	24	p= 0.82975 0.17025	w= 0.13140 1.00000
	model2	-1157.74	26	p= 0.65029 0.34359 0.00613	w= 0.09212 1.00000 35.29319
	model7	-1177.53	24	p = 0.34665 q = 0.92498
	model8	-1157.71	26	p0 = 0.99384 p = 0.16723 q = 0.25016 (p1 = 0.00616)	w = 34.98783
