# Supplementary material for: Comparative Chloroplast Genomics of Dipsacales Species: Insights Into Sequence Variation, Adaptive Evolution, and Phylogenetic Relationships
Source: Front Plant Sci. 2018 May 23;9:689. doi: 10.3389/fpls.2018.00689 (PMC5974163; doi:10.3389/fpls.2018.00689)
Supplement: TABLE S7 — Maximum likelihood parameter estimates for 19 genes with positive selection sites. [file Table_7.XLSX]

## Sheet: Sheet1
Table S7 Maximum likelihood parameter estimates for 19 genes with positive selection sites.
gene	model	l	np	Estimates of parameters		positively selected sites
atpA	model1	-3226.48	24	p0= 0.86513 0.13487	w= 0.02425 1.00000
	model2	-3203.66	26	p= 0.85955 0.13218 0.00826	w= 0.03251 1.00000 13.96099	308 H 0.999**
	model7	-3227.56	24	p = 0.03108 q = 0.17874
	model8	-3204.14	26	p0 = 0.99125 p = 0.04494 q = 0.23198 (p1 = 0.00875)	w = 13.56165	308 H 1.000** 427 K 0.992** 463 N 0.998**
atpB	model1	-2891.67	24	p= 0.90405 0.09595	w= 0.03498 1.00000
	model2	-2867.64	26	p= 0.88176 0.11605 0.00219	w= 0.03123 1.00000 44.75304
	model7	-2891.91	24	p = 0.03203 q = 0.20834
	model8	-2867.84	26	p0 = 0.99779 p = 0.03536 q = 0.20954 (p1 = 0.00221)	w = 44.41777	378 G 0.994**
atpI	model1	-1333.43	24	p= 0.93048 0.06952	w= 0.00758 1.00000
	model2	-1306.19	26	p= 0.99189 0.00000 0.00811	w= 0.07216 1.00000 45.57761	101 L 0.999**
	model7	-1334.03	24	p = 0.00500 q = 0.03872
	model8	-1306.2	26	p0 = 0.99189 p = 7.75416 q = 99.00000 (p1 = 0.00811)	w = 45.58547	101 L 1.000**
clpP	model1	-1224.14	24	p= 0.38269 0.61731	w= 0.29307 1.00000
	model2	-1213.91	26	p= 0.18925 0.69074 0.12002	w= 0.37779 1.00000 5.56910	4 I 0.994** 9 W 0.998**
	model7	-1225.26	24	p = 0.71712 q = 0.21687
	model8	-1213.89	26	p0 = 0.87707 p = 1.02523 q = 0.18541 (p1 = 0.12293)	w = 5.44223	4 I 0.995** 9 W 0.998**
infA	model1	-594.843	24	p= 0.82993 0.17007	w= 0.18975 1.00000
	model2	-590.051	26	p= 0.96867 0.00000 0.03133	w= 0.30978 1.00000 6.74721	6 S 0.996**
	model7	-595.881	24	p = 0.39299 q = 0.63793
	model8	-590.06	26	p0 = 0.96892 p = 44.73952 q = 99.00000 (p1 = 0.03108)	w = 6.78042	6 S 0.998**
matK	model1	-3815.32	24	p= 0.65762 0.34238	w= 0.09852 1.00000
	model2	-3808.04	26	p= 0.63729 0.36056 0.00215	w= 0.09563 1.00000 17.90099
	model7	-3815.5	24	p = 0.15953 q = 0.23162
	model8	-3807.9	26	p0 = 0.99784 p = 0.18623 q = 0.26469 (p1 = 0.00216)	w = 17.56547	81 A 0.994**
psaA	model1	-4045.63	24	p= 0.95520 0.04480	w= 0.00000 1.00000
	model2	-4026.27	26	p= 0.95112 0.04733 0.00155	w= 0.00000 1.00000 32.14176
	model7	-4048.36	24	p = 0.01073 q = 0.19651
	model8	-4027.86	26	p0 = 0.99744 p = 0.00501 q = 0.09610 (p1 = 0.00256)	w = 24.77429	209 S 0.993**
psaJ	model1	-282.586	24	p= 0.90521 0.09479	w= 0.00000 1.00000
	model2	-259.129	26	p= 0.95546 0.00000 0.04454	w= 0.14200 1.00000 108.64573	10 V 1.000**
	model7	-282.589	24	p = 0.00500 q = 0.04633
	model8	-259.13	26	p0 = 0.95546 p = 16.44384 q = 99.00000 (p1 = 0.04454)	w = 108.68170	10 V 1.000**
psbC	model1	-2617.41	24	p= 0.94925 0.05075	w= 0.00000 1.00000
	model2	-2597.64	26	p= 0.94371 0.05265 0.00364	w= 0.00000 1.00000 25.56212	277 A 0.988*
	model7	-2618.84	24	p = 0.01077 q = 0.19106
	model8	-2598.09	26	p0 = 0.99592 p = 0.01148 q = 0.21188 (p1 = 0.00408)	w = 24.35297	277 A 0.996**
psbK	model1	-366.123	24	p= 0.87053 0.12947	w= 0.07378 1.00000
	model2	-339.492	26	p= 0.96733 0.00017 0.03250	w= 0.89600 1.00000 129.70771
	model7	-366.313	24	p = 0.00775 q = 0.02402
	model8	-339.492	26	p0 = 0.96750 p = 99.00000 q = 11.44564 (p1 = 0.03250)	w = 129.76955	15 S 0.996**
rbcL	model1	-2792.04	24	p= 0.91056 0.08944	w= 0.00000 1.00000
	model2	-2761.29	26	p= 0.90502 0.08197 0.01301	w= 0.00000 1.00000 13.22085	95 N 0.999** 328 S 0.998** 447 G 0.999**
	model7	-2792.17	24	p = 0.00500 q = 0.04802
	model8	-2761.57	26	p0 = 0.98738 p = 0.00500 q = 0.04979 (p1 = 0.01262)	w = 13.82890	95 N 1.000** 279 S 0.994** 309 I 0.997** 328 S 1.000** 447 G 1.000**
rpl22	model1	-1116	24	p= 0.43089 0.56911	w= 0.00000 1.00000
	model2	-1110.64	26	p= 0.40452 0.56676 0.02872	w= 0.00000 1.00000 7.89192	123 R 0.994**
	model7	-1116.11	24	p = 0.00746 q = 0.00500
	model8	-1110.67	26	p0 = 0.97158 p = 0.00744 q = 0.00500 (p1 = 0.02842)	w = 8.06247	123 R 0.998**
rpl32	model1	-470.377	24	p= 0.84821 0.15179	w= 0.03879 1.00000
	model2	-455.109	26	p= 0.68175 0.28138 0.03686	w= 0.00055 1.00000 19.97567	27 S 1.000**
	model7	-470.205	24	p = 0.09792 q = 0.48422
	model8	-455.069	26	p0 = 0.96310 p = 0.01628 q = 0.04597 (p1 = 0.03690)	w = 19.33178	27 S 1.000**
rps3	model1	-1466.62	24	p= 0.19862 0.80138	w= 0.00000 1.00000
	model2	-1456.54	26	p= 0.49191 0.00000 0.50809	w= 0.00000 1.00000 3.92609	133 L 0.995**
	model7	-1467.66	24	p = 37.96748 q = 0.00500
	model8	-1456.54	26	p0 = 0.49191 p = 0.00500 q = 1.18168 (p1 = 0.50809)	w = 3.92610
rps7	model1	-902.782	24	p= 0.29943 0.70057	w= 0.00000 1.00000
	model2	-897.746	26	p= 0.59878 0.00000 0.40122	w= 0.00000 1.00000 4.63008
	model7	-903.753	24	p = 9.45259 q = 0.00500
	model8	-897.746	26	p0 = 0.59878 p = 0.00500 q = 2.03557 (p1 = 0.40122)	w = 4.63008	47 V 0.992**
rps14	model1	-681.759	24	p= 0.74445 0.25555	w= 0.00000 1.00000
	model2	-655.056	26	p= 0.60871 0.36800 0.02329	w= 0.00000 1.00000 38.78384	41 S 0.999**
	model7	-681.926	24	p = 0.00500 q = 0.01171
	model8	-655.072	26	p0 = 0.97668 p = 0.00500 q = 0.00754 (p1 = 0.02332)	w = 39.79425	41 S 1.000**
rps15	model1	-771.389	24	p= 0.67698 0.32302	w= 0.06165 1.00000
	model2	-760.138	26	p= 0.59588 0.38111 0.02302	w= 0.04620 1.00000 14.60038	88 R 1.000**
	model7	-771.952	24	p = 0.07441 q = 0.12574
	model8	-760.12	26	p0 = 0.97653 p = 0.09025 q = 0.13040 (p1 = 0.02347)	w = 14.15718	88 R 1.000**
ycf1	model1	-14608.4	24	p= 0.34387 0.65613	w= 0.07441 1.00000
	model2	-14536.9	26	p= 0.25790 0.58051 0.16159	w= 0.05359 1.00000 3.82905	434 I 0.991** 435 R 0.997** 436 W 0.995** 454 G 0.998** 495 S 0.995**
	model7	-14610.3	24	p = 0.01447 q = 0.00500
	model8	-14537	26	p0 = 0.83966 p = 0.05131 q = 0.01923 (p1 = 0.16034)	w = 3.87007	313 H 0.991** 379 T 0.994** 380 R 0.994** 388 E 0.991** 430 T 0.996** 434 I 0.997** 435 R 0.999** 436 W 0.998** 449 L 0.996** 495 S 0.998** 997 S 0.993** 1018 Q 0.992** 1033 R 0.993** 1035 D 0.992** 1037 I 0.990** 1038 M 0.993**
ycf2	model1	-12590.5	24	p= 0.51328 0.48672	w= 0.00000 1.00000
	model2	-12501.9	26	p= 0.41252 0.52504 0.06243	w= 0.00000 1.00000 9.05314	1 S 0.999** 4 H 0.997** 1047 S 0.997** 1170 S 0.998** 1172 P 0.992** 1173 K 0.997** 1179 D 0.998** 1183 T 0.998** 1185 E 0.991** 1190 V 0.992** 1194 S 0.999** 1818 L 0.998** 1819 P 0.993** 1820 K 1.000**
	model7	-12590.7	24	p = 0.00524 q = 0.00531
	model8	-12502.4	26	p0 = 0.93985 p = 0.00871 q = 0.00583 (p1 = 0.06015)	w = 9.72180	1 S 1.000** 4 H 0.999** 1047 S 0.999** 1170 S 0.999** 1172 P 0.996** 1173 K 0.998** 1179 D 0.999** 1180 D 0.999** 1183 T 0.999** 1184 S 0.990** 1185 E 0.995** 1190 V 0.996** 1192 H 0.991** 1194 S 0.999** 1194 S 0.999** 1385 L 0.993** 1818 L 0.999** 1819 P 0.997** 1820 K 1.000**
